# Lack of Association between the Tagging SNP A+930→G of SOCS3 and Type 2 Diabetes Mellitus: Meta-Analysis of Four Independent Study Populations

Antje Fischer-Rosinsky<sup>1,2</sup>, Eva Fisher<sup>3</sup>, Peter Kovacs<sup>4</sup>, Matthias Blüher<sup>5</sup>, Matthias Möhlig<sup>1,2</sup>, Andreas F. H. Pfeiffer<sup>1,2</sup>, Heiner Boeing<sup>3</sup>, Joachim Spranger<sup>1,2\*</sup>

**1** Department of Endocrinology, Charité-Universitätsmedizin Berlin, Campus Benjamin Franklin, Diabetes and Nutrition, Berlin, Germany, **2** Department of Clinical Nutrition, German Institute of Human Nutrition Potsdam-Rehbrücke, Nuthetal, Germany, **3** Department of Epidemiology, German Institute of Human Nutrition Potsdam-Rehbrücke, Nuthetal, Germany, **4** Interdisciplinary Centre for Clinical Research, University of Leipzig, Leipzig, Germany, **5** Department of Internal Medicine III, University of Leipzig, Leipzig, Germany

## Abstract

**Background:** The suppressor of cytokine signalling 3 (SOCS3) provides a link between cytokine action and their negative consequences on insulin signalling. Thus SOCS3 is a potential candidate gene for type 2 diabetes (T2DM).

**Methodology/Principal Findings:** Based on HapMap we identified the polymorphism A+930→G (rs4969168) as a haplotype tagging SNP (htSNP) sufficiently covering the genetic variation of the whole gene. We therefore examined the association between rs4969168 within SOCS3 and T2DM in three independent study populations; one prospective case-cohort study and two cross-sectional study populations. Due to the low frequency of individuals being homozygous for the polymorphism a dominant model of inheritance was assumed. The case-cohort study with 2,957 individuals (764 of them with incident T2DM) showed no effect of the polymorphism on diabetes risk (hazard ratio (95%CI): 0.86 (0.66–1.13);  $p = 0.3$ ). Within the MeSyBePo-study population 325 subjects had T2DM from a total of 1,897 individuals, while the second cross-sectional cohort included 851 cases of T2DM within a total of 1653 subjects. According to the results in the prospective study, no association with T2DM was found (odds ratio (95%CI): 0.78 (0.54–1.12) for MesyBepo and 1.13 (0.90–1.42) for the Leipzig study population). There was also no association with metabolic subtraits such as insulin sensitivity ( $p = 0.7$ ), insulin secretion ( $p = 0.8$ ) or the hyperbolic relation of both, the disposition index ( $p = 0.7$ ). In addition, no evidence for interaction with BMI or sex was found. We subsequently performed a meta-analysis, additionally including the publicly available data from the T2DM-subcohort of the WTCCC ( $n = 4,855$ ). The overall odds ratio within that meta-analysis was 0.96 (0.88–1.06).

**Conclusions/Significance:** There is no strong effect of the common genetic variation within the SOCS3 gene on the development of T2DM.

**Citation:** Fischer-Rosinsky A, Fisher E, Kovacs P, Blüher M, Möhlig M, et al. (2008) Lack of Association between the Tagging SNP A+930→G of SOCS3 and Type 2 Diabetes Mellitus: Meta-Analysis of Four Independent Study Populations. PLoS ONE 3(12): e3852. doi:10.1371/journal.pone.0003852

**Editor:** Kathrin Maedler, University of Bremen, Germany

**Received:** June 11, 2008; **Accepted:** November 13, 2008; **Published:** December 4, 2008

**Copyright:** © 2008 Fischer-Rosinsky et al. This is an open-access article distributed under the terms of the Creative Commons Attribution License, which permits unrestricted use, distribution, and reproduction in any medium, provided the original author and source are credited.

**Funding:** JS was supported by a research group of the BMBF (Molecular Nutrition), a Heisenberg-Professorship (SP716/2-1), a clinical research group (KFO 192/0) and a graduate school (GK1208) of the Deutsche Forschungsgemeinschaft (DFG). This project has been additionally funded by the BMBF (01GSO487) within the framework of NGFN2 (Neuronetz Adipositas). The Leipzig study was also supported by grants from DFG, the Clinical Research Group 'Atherosclerosis' KFO 152 (projects BL 833/1-1 to MB) and from the Interdisciplinary Centre for Clinical Research (IZKF) Leipzig at the Faculty of Medicine of the University of Leipzig (Project N06 to PK). The funding institutions had no role within the design, analysis or interpretation of the data and the study was not approved by those institutions.

**Competing Interests:** The authors have declared that no competing interests exist.

\* E-mail: joachim.spranger@charite.de

## Introduction

The genetic impact on type 2 diabetes mellitus (T2DM) is well known. However, due to various reasons, including considerable heterogeneity of the disease, the identification of susceptibility genes is difficult and most associations have not been replicated.

The suppressor of cytokine signalling 3 (SOCS3) provides a molecular link between cytokine action and insulin signalling [1]. In addition, SOCS3 has been shown to mediate a reduction of  $\beta$ -cell volume and modulates cytokine signalling in pancreatic  $\beta$ -cells [2].

Thus, from a functional perspective, SOCS3 appeared to be a convincing candidate gene with respect to T2DM. We investigated the only tagging SNP A+930→G (rs4969168, noncoding) of the

gene [3] to examine its genetic impact on T2DM and parameters of the glucose metabolism in three independent study populations; one prospective case-cohort study and two cross-sectional study populations. A meta-analysis including publicly available data was also performed.

## Results

We here investigated a potential association between the tagging SNP A+930→G of the SOCS3 gene with T2DM or associated subtraits in three independent study populations.

The replication rate of genotyping was 99% and the genotype distribution were in Hardy Weinberg Equilibrium ( $\chi^2_{EPI} = 3.66$ ;

$\chi^2_{\text{MeSyBePo}} = 0.13$ ;  $\chi^2_{\text{Leipzig}} = 0.18$ ). In all subsequent calculations exclusively the dominant model was analysed due to the low frequency of homozygous carriers of the. Cox proportional hazard and logistic regression models adjusted for age, gender and BMI did not show any significant associations between the polymorphism and T2DM (see table 1A–C). The association between the polymorphism and validated indices estimating insulin sensitivity was also investigated within the MesyBepo study population. Comparably to the lack of association with diabetes, no relation to insulin sensitivity ( $p = 0.7$ ), insulin secretion ( $p = 0.8$ ) or Disposition Index was found ( $p = 0.7$ ) (see table 1D). In addition, no interaction between the polymorphism with BMI or sex was found with respect to T2DM.

We also performed a meta-analysis using the here genotyped three study populations and publicly available data from the WTCCC, resulting in a total 11,335 individuals. Crude odds ratios were calculated for this meta-analysis due to limited access to individualized information within the publicly available data. In addition, the different study designs need to be considered for interpretation of the meta-analysis. Crude OR was 0.95 (95%CI 0.77–1.17) for the EPIC-Potsdam cohort, 0.73 (95%CI 0.53–1.01) for the MeSyBePo study population, 1.13 (95%CI 0.90–1.42) for the population from the region of Leipzig and 0.96 (95%CI 0.85–1.10) for the T2DM-subcohort in the WTCCC. Meta-analysis revealed a total odds ratio of 0.96 (95%CI 0.88–1.06) (Figure 1). Genotype frequencies of all study populations are shown in table 2. Power calculations revealed that the meta-analysis provided 80% power to detect a 12% risk modification.

**Table 1.** Results of the tagging SNP A+930→G (genetic dominant model) for A) the Cox model for T2DM in EPIC, B) the logistic regression model in MeSyBePo, C) the logistic regression model in the Leipzig cohort and D) for the linear regression model of D1) ISI-insulin sensitivity, D2)  $\text{AUC}_{\text{Insulin}}/\text{AUC}_{\text{Glucose}}$ -insulin secretion, D3) DI-disposition index.

| A)  |                                                               |                      |         |
|-----|---------------------------------------------------------------|----------------------|---------|
|     | Genotype ( $n_{\text{subcohort}}/n_{\text{external cases}}$ ) | Hazard Ratio (95%CI) | p-value |
|     | GG (1,835/563)                                                | 1 (reference)        |         |
|     | GA+AA (399+32/118+10)                                         | 0.86 (0.66–1.13)     | 0.3     |
| B)  |                                                               |                      |         |
|     | Genotype ( $n_{\text{non-case}}/n_{\text{case}}$ )            | Odds Ratio (95%CI)   | p-value |
|     | GG (1227/268)                                                 | 1 (reference)        |         |
|     | GA+AA (322+23/55+2)                                           | 0.78 (0.54–1.12)     | 0.8     |
| C)  |                                                               |                      |         |
|     | Genotype ( $n_{\text{non-case}}/n_{\text{case}}$ )            | Odds Ratio (95%CI)   | p-value |
|     | GG (621/642)                                                  | 1 (reference)        |         |
|     | GA+AA (170+10/202+8)                                          | 1.25 (0.95–1.66)     | 0.1     |
| D)  |                                                               |                      |         |
|     | Genotype                                                      | Mean ( $\pm$ SD)     | p-value |
| D1) | GG                                                            | 0.079 $\pm$ 0.027    | 0.7     |
|     | GA+AA                                                         | 0.078 $\pm$ 0.030    |         |
| D2) | GG                                                            | 45.69 $\pm$ 30.17    | 0.8     |
|     | GA+AA                                                         | 46.02 $\pm$ 30.09    |         |
| D3) | GG                                                            | 3.53 $\pm$ 1.81      | 0.7     |
|     | GA+AA                                                         | 3.49 $\pm$ 1.92      |         |

All models were adjusted for age, gender and BMI, respectively.  
doi:10.1371/journal.pone.0003852.t001

## Discussion

From a functional perspective, SOCS3 is a convincing candidate gene for genetic association studies investigating susceptibility for T2DM. This study examined a variant in the 3' UTR of SOCS3 for association with T2DM and related traits. This variant covers the genetic variation within SOCS3 according to HapMap data, thus being the only haplotype tagging SNP within this gene [3]. The samples included a total of 1897 individuals from the cross-sectional MeSyBePo study, 1653 individuals from a cross-sectional study from the region of Leipzig and 2957 individuals from the prospective EPIC-Potsdam study. Surrogate measures of insulin secretion and sensitivity were obtained in non-diabetic MeSyBePo participants. A meta-analysis of the here genotyped data and publicly available data from the WTCCC was additionally performed. This meta-analysis had an 80% power to detect effect sizes of 12% given the frequency of the here investigated polymorphism. All results are negative for association with T2DM or related traits.

Some shortcomings of this study should be mentioned. All high-density genome-wide association studies have not found effects within the region of SOCS3. Given the existing data the study may be underpowered to demonstrate small associations, which are not entirely unlikely given the existing results of genome-wide association studies. Aiming to investigate those smaller effects the here presented data may be valuable for future meta-analyses in combination with additional future available data. The existing data of genome-wide scans did not investigate potential interaction with environmental factors such as BMI or sex. Those interactions are unlikely to exist given our data. However, the analysis of interactions further reduces the power of studies making future meta-analyses also desirable.

In conclusion, we were unable to detect an effect of the one tagging SNP A+930→G of the SOCS3-gene on T2DM or associated subtraits. Although a substantial effect of this SNP can be excluded, small risk modifications may still exist, which should be investigated in future meta-analyses.

## Materials and Methods

Details of recruitment and phenotyping (Case/Control: age 59.57/50.63 years; ♀ 181/1088; ♂ 144/484; BMI 32.24/28.67) of the MeSyBePo-study were published recently [4]. In all participants of MeSyBePo a 75 g oral glucose tolerance test (OGTT) with insulin measurements was performed. 325 participants with T2DM were compared to 1,572 non-affected individuals. The association between the polymorphism and the Disposition Index was investigated only in individuals with NGT, IFG or IGT, since accepted markers of insulin sensitivity and secretion have been shown to be unreliable in patients with type 2 diabetes mellitus, especially in patients with anti-diabetic treatment. An euglycemic hyperinsulinemic clamp was performed in a subset of 56 healthy controls. In these participants, the Insulin Sensitivity Index (ISI) according to Stumvoll ( $\text{ISI} = \text{Ins}_{120} - 0.00519 \text{ Gluc}_{90} - 0.000299 \text{ Ins}_0$ ) correlated best to the M-value ( $r = 0.591$ ;  $p < 0.001$ ) of the clamps [5]. Therefore ISI was subsequently used to estimate insulin sensitivity in the total cohort. As the characteristics of our study population were basically comparable to those of Stumvolls population, the ratio of  $\text{AUC}_{\text{Insulin}}/\text{AUC}_{\text{Glucose}}$ , which performed best in Stumvolls study compared to a hyperglycemic clamp, was used to estimate insulin secretion. Correspondingly the disposition index (DI) was calculated as the product of ISI and  $\text{AUC}_{\text{Insulin}}/\text{AUC}_{\text{Glucose}}$  [5,6].

A second cross-sectional study population was from the region of Leipzig. DNA from 852 patients with T2DM (♀ 408, ♂ 444) and

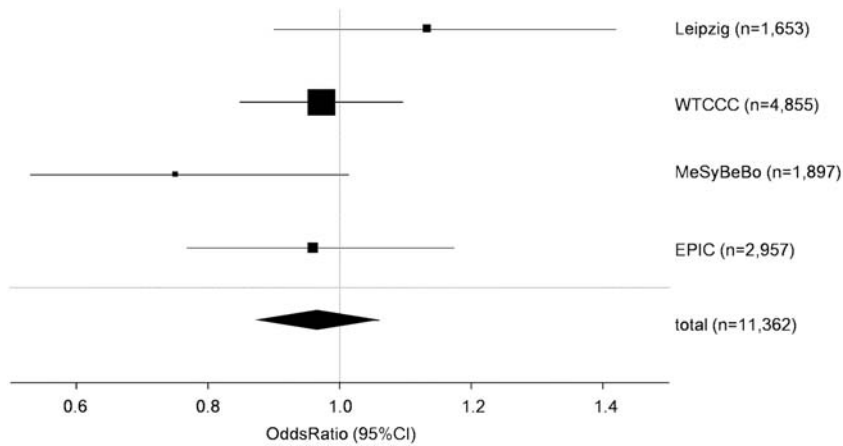

**Figure 1. Forest blot presenting the meta-analysis of the study populations EPIC, MeSyBePo, Leipzig and the WTCCC.** The size of each square is proportional to the study's weight within the meta-analysis. The overall effect estimate is plotted as a diamond. The lateral points of that diamond indicate the 95%-CI of this estimate.  
doi:10.1371/journal.pone.0003852.g001

801 non-diabetic subjects ( $\bar{x}$  555,  $\sigma$  246) recruited at the University Hospital in Leipzig, Germany were available for the present study. The non-diabetic subjects had mean age  $49 \pm 14$  years and mean BMI  $28.6 \pm 5.6$  kg/m<sup>2</sup>, and patients with T2DM had mean age  $64 \pm 11$  years and mean BMI  $29.6 \pm 5.2$  kg/m<sup>2</sup> (arithmetic means  $\pm$ SD). In addition, OGTT was performed in all non-diabetic subjects. Since impaired glucose tolerance is a T2DM predicting factor, only subjects with normal glucose tolerance ( $N = 633$ ) were included as healthy controls in the T2D case-control study.

Association with incident T2DM was assessed in a nested case-cohort study within the EPIC-Potsdam- (European Prospective Investigation into Cancer and Nutrition) study, a prospective cohort involving 27,548 Caucasian volunteers mainly aged 35–65 years from the general population [7]. The case-cohort has been described in detail before [8]. 2,266 individuals were randomly selected for a subcohort and 764 incident cases were included in the present analysis. Because the subcohort is representative of the entire cohort at baseline, 73 incident T2DM were included in the subcohort and 691 incident cases were identified in the remaining cohort, the latter classified as 'external' cases (external cases/subcohort subjects: age  $54.7/49.5$  years;  $\bar{x}$  280/1,401,  $\sigma$  411/865; BMI  $30.4/26.0$ , mean follow up: 7 years). Both studies have been approved by the local ethic authorities, namely the EPIC-study

was approved by the ethic committee of Brandenburg and MeSyBePo was approved by the ethic committee of the University of Potsdam and the Charité-Universitätsmedizin Berlin. All study participants gave written informed consent to the studies, respectively.

Genotyping was performed by TaqMan<sup>®</sup>-technology (HT7900 System; ABI, Foster City, CA, USA). Details of genotyping will be given by the authors upon request. The polymorphism was chosen by the tag SNP Picker on the International HapMap Project web side with an  $r^2$ -cut off of 1 and a minor allele frequency cut off of 0.1 [3].

Finally publicly available data of a sub-cohort of the WTCCC (Welcome Trust Case Control Consortium) with genotyped data of the SOCS3 polymorphism were used including a total of 4,355 persons ( $n_{\text{case}} = 1,422$ ;  $n_{\text{control}} = 2,933$ ).

Data were analyzed using SPSS (SPSS Inc., Chicago, IL, USA, version 12.0) and SAS (SAS Institute, Cary, NC, USA, version 9.1). General linear model was calculated to analyse the effects of the polymorphism on continuous variables after adjustment for confounders (age, sex, BMI). Hazard ratios were calculated using Cox proportional hazard regression analysis modified according to the Barlow method in EPIC-Potsdam. Unconditional logistic regression analysis was performed to estimate prevalent odds ratios in MeSyBePo. Multiplicative interaction terms between the

**Table 2. Genotype frequency of the tagging SNP A+930→G in the three study populations included in the meta-analysis.**

|          | genotype | study population (n %) |               |               |             | total         |
|----------|----------|------------------------|---------------|---------------|-------------|---------------|
|          |          | EPIC                   | MeSyBePo      | WTCCC         | Leipzig     |               |
| cases    | AA       | 11 (1.4%)              | 2 (0.6%)      | 38 (2.0%)     | 8 (0.9%)    | 59 (1.5%)     |
|          | AG       | 129 (16.8%)            | 56 (17.2%)    | 491 (25.6%)   | 202 (23.7%) | 871 (22.7%)   |
|          | GG       | 624 (81.8%)            | 267 (82.2%)   | 1,393 (72.4%) | 642 (75.4%) | 2,907 (75.8%) |
|          | Total    | 764                    | 325           | 1,922         | 852         | 3,837         |
| controls | AA       | 31 (1.4%)              | 22 (1.4%)     | 71 (2.4%)     | 10 (1.3%)   | 134 (1.8%)    |
|          | AG       | 388 (17.7%)            | 323 (20.6%)   | 758 (25.8%)   | 170 (21.2%) | 1,638 (21.9%) |
|          | GG       | 1,774 (80.9%)          | 1,227 (78.0%) | 2,104 (71.8%) | 621 (77.5%) | 5,726 (76.3%) |
|          | Total    | 2,193                  | 1,572         | 2,933         | 801         | 7,498         |

doi:10.1371/journal.pone.0003852.t002

genotype and age, sex or BMI, respectively, were used to analyze potential interactions of these variables and disease risk. A two-tailed alpha-error below 5% was considered to be significant.

Power analysis was performed using Quanto [9]. We assumed an unmatched case-control design (EPIC 1:3.4, MeSyBePo 1:3.7, Leipzig 1:0.94), a population risk of 0.06 for T2DM and considered a two-sided p-value of 0.05. Meta-analysis has been performed using the Mantel-Haenszel method, which assumes a fixed effect and combines studies according to the weight given to

each study. All analyses were performed using a dominant genetic model, due to the low frequency of homozygote mutant carriers.

### Author Contributions

Conceived and designed the experiments: AFR EF AFHP HB JS. Performed the experiments: AFR PK. Analyzed the data: AFR EF PK MB HB JS. Contributed reagents/materials/analysis tools: EF PK MB MM AFHP HB. Wrote the paper: AFR MB JS.

### References

1. Rieusset J, Bouzakri K, Chevillotte E, Ricard N, Jacquet D, et al. (2004) Suppressor of cytokine signaling 3 expression and insulin resistance in skeletal muscle of obese and type 2 diabetic patients. *Diabetes* 53: 2232–2241.
2. Lindberg K, Ronn SG, Tornhave D, Richter H, Hansen JA, et al. (2005) Regulation of pancreatic beta-cell mass and proliferation by SOCS-3. *J Mol Endocrinol* 35: 231–243.
3. International HapMap Consortium (2003) The International HapMap Project. *Nature* 426: 789–796.
4. Fischer A, Fisher E, Mohlig M, Schulze M, Hoffmann K, et al. (2007) KCNJ11 E23K affects diabetes risk and is associated with the Disposition index: results of two independent German cohorts. *Diabetes Care*.
5. Stumvoll M, Mitrakou A, Pimenta W, Jenssen T, Yki-Jarvinen H, et al. (2000) Use of the oral glucose tolerance test to assess insulin release and insulin sensitivity. *Diabetes Care* 23: 295–301.
6. Bergman RN, Ader M, Huecking K, Van Citters G (2002) Accurate assessment of beta-cell function: the hyperbolic correction. *Diabetes* 51 Suppl 1: S212–220.
7. Boeing H, Korfmann A, Bergmann MM (1999) Recruitment procedures of EPIC-Germany. European Investigation into Cancer and Nutrition. *Ann Nutr Metab* 43: 205–215.
8. Schulze MB, Al-Hasani H, Boeing H, Fisher E, Doring F, et al. (2007) Variation in the HHEX-IDE gene region predisposes to type 2 diabetes in the prospective, population-based EPIC-Potsdam cohort. *Diabetologia*.
9. Gauderman W (2002) Sample size requirements for association studies of gene-gene interaction. *Am J Epidemiol* 155: 478–484.
